# Supplementary material
Source: MDPI journal article supplement (https://www.mdpi.com/1999-4907/14/8/1662)
Supplement: s1 [file s1 › forests-2494419-SI-main.pdf]

# Supplementary Materials:

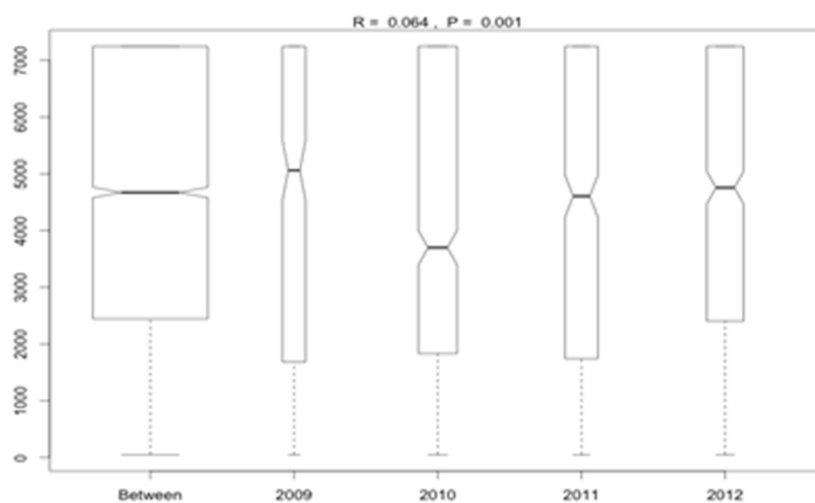

**Figure S1.** Analysis of variance based on similarities (ANOSIM) to determine if there are differences among the study years.

**Table S1.** Meteorological data from the Arabayona meteorological station (Salamanca, Spain) during the study period.

**Table S2.** List of species identified with the abbreviated name (in red species not mentioned in Figure 8), their current scientific name and personal herbarium reference number.

**Table S3.** Dimension, Eigenvalues, Variance Explained and Cumulative Variance.

| Dimension | Eigenvalues | Variance Explained | Cumulative |
|-----------|-------------|--------------------|------------|
| Dim1      | 11.829053   | 17.389475          | 17.38947   |
| Dim2      | 8.592511    | 12.631547          | 30.02102   |
| Dim3      | 6.198762    | 9.112582           | 39.13360   |
| Dim4      | 3.448150    | 5.069003           | 44.20261   |
| Dim5      | 2.677300    | 3.935804           | 48.13841   |
