# Supplementary material
Source: MDPI journal article supplement (https://www.mdpi.com/1999-4907/14/8/1662)
Supplement: s1 [file s1 › Table S1.xlsx]

## Sheet: Weekly data
Year 2009
Week	Average weekly temperature	Average temperature 2 weeks before	Average weekly maximum temperature	Average weekly minimum temperature	Average weekly relative humidity	Average weekly wind speed	Average weekly wind direction	Average weekly solar exposure (radiation)	Average weekly rainfall or precipitation	Cumulative precipitation (rainfall) 4 weeks before
	ºC	ºC	ºC	ºC	%	m/s	(360 degrees)	MJ/m^2	mm	mm
6	2.83286		8.76	-3.13	92.0286	2.65714	266.629	6.88571	0.975	No data
7	3.4425	3.13768	10.12	-3.13	92.0125	2.8	263.85	6.6125	0.84	No data
8	4.37286	3.90768	12.47	-3.09	84.0857	2.14571	156.293	11.5457	0.6	No data
9	3.68714	4.03	12.95	-3.76	72.0614	1.52571	107.141	13.2686	0	2.415
10	5.80857	4.74786	17.43	-2.7	73.2743	1.84857	111.107	14.0214	0	1.44
11	6.68429	6.24643	18.65	0.57	82.7457	2.89429	263.794	11.0057	1.35	1.95
12	10.0529	8.36857	21.98	0.16	58.0729	1.72571	165.783	17.0514	0	1.35
13	10.8714	10.4621	21.01	-2.41	44.0271	2.24286	145.444	19.08	0	1.35
14	8.18	9.52571	22.51	-2.82	50.6686	2.78286	122.12	16.7329	0	1.35
15	7.46429	7.82214	21.28	-5.12	59.1229	2.22714	152.287	19.44	0	0
16	7.85143	7.65786	17.82	0.22	65.8186	2.45857	279.414	16.9114	6.7	6.7
17	6.90714	7.37929	16.62	-0.02	84.9529	2.18714	219.989	15.5971	2.54	9.24
18	10.6757	8.79143	23.05	0.89	59.6571	2.12857	202.571	22.8143	0.1	9.34
19	10.3614	10.5186	22.87	-0.16	68.4586	2.64429	186.703	22.1029	0.2	9.54
20	15.99	13.1757	27.43	1.3	52.6371	2.39857	185.524	23.29	0	2.84
21	12.7014	14.3457	22.43	1.3	65.1071	2.21714	266.857	23.09	0.45	0.75
22	16.8643	14.7829	29.13	4.24	53.4486	1.83143	239.443	22.7471	1.45	2.1
23	16.4771	16.6707	30.13	3.08	58.0414	2.09143	162.083	24.8929	1.6	3.5
24	16.7243	16.6007	29.69	8.51	57.2871	2.08143	232.536	21.0057	0.75	4.25
25	19.1886	17.9564	34.68	4.93	58.9543	2.20143	257.814	23.6357	0.8	4.6
26	20.8571	20.0229	33.73	6.14	62.3686	2.20714	144.229	24.2814	3	6.15
27	19.27	20.0636	31.99	7.1	54.0729	1.88857	231.776	25.9157	0.3	4.85
28	21.9214	20.5957	31.62	11.61	55.3657	1.93	265.5	26.0743	0	4.1
29	20.78	21.3507	32.13	9.16	47.0486	2.02714	223.837	27.1886	0	3.3
30	19.49	20.135	32.05	6.04	46.2429	1.84286	252.313	27.1686	0	0.3
31	21.7586	20.6243	34.67	9.02	45	2.52143	217.374	23.4243	0.4	0.4
32	20.4929	21.1257	32.11	8.35	47.24	1.87714	270	25.1943	2.2	2.6
33	21.1657	20.8293	33.58	11.67	58.3686	2.43714	175.231	23.9571	10.4	13
34	23.3943	22.28	34.78	11.45	49.2357	1.72857	155.89	22.3443	0.1	13.1
35	24.3929	23.8936	34.52	11.93	42.9571	1.80429	232.851	22.7586	0	12.7
36	21.0143	22.7036	32.97	8.84	47.9814	2.14429	178.561	21.7029	0	10.5
37	20.4386	20.7264	33.33	8.27	47.7271	2.25143	208.23	20.1771	0	0.1
38	21.3543	20.8964	32.34	9.56	45.9771	1.86	192.341	19.4	0	0
39	12.9071	17.1307	21.87	3.79	66.7471	2.35571	113.899	14.6957	0.1	0.1
40	15.9857	14.4464	26.48	6.06	59.4543	1.67	119.773	17.7886	0	0.1
41	16.31	16.1479	26.24	7.38	68.5729	1.53143	200.257	13.8514	6.6	6.7
42	16.9	16.605	25.94	8.11	72.66	1.88	215.91	12.6657	0.3	7
43	10.2557	13.5779	22.72	-2.52	53.6714	2.22714	65.4043	14.6171	0	6.9
44	11.5614	10.9086	21.82	1.04	81.4543	2.15143	244.471	7.33286	4.93333	11.8333
45	15.1314	13.3464	24.11	8.11	79.3186	1.39571	205.244	10.4971	0.45	5.68333
46	9.20571	12.1686	15.45	4.81	79.2271	2.81429	282.043	8.51	0.2	5.58333
47	10.4529	9.82929	17.65	2.92	80.7	2.83286	251.114	6.77857	1.7	7.28333
48	10.17	10.3114	18.26	4.38	84.1143	2.34143	210.591	6.42857	0.575	2.925
49	6.01429	8.09214	11.34	-1.5	93	2.44857	239.5	5.70571	1.7	4.175
50	6.33857	6.17643	12.7	0.16	91.3286	2.91857	253.429	5.70857	0.46	4.435
51	4.68143	5.51	13.69	-1.58	90.66	2.19857	174.649	4.74571	0.466667	3.20167
52	-1.24143	1.72	7.88	-9.49	87.8667	2.17286	135.04	5.24	1.23333	3.86
Year 2010
Week	Average weekly temperature	Average temperature 2 weeks before	Average weekly maximum temperature	Average weekly minimum temperature	Average weekly relative humidity	Average weekly wind speed	Average weekly wind direction	Average weekly solar exposure (radiation)	Average weekly rainfall or precipitation	Cumulative precipitation (rainfall) 4 weeks before
	ºC	ºC	ºC	ºC	%	m/s	(360 degrees)	MJ/m^2	mm	mm
53	4.46714	1.61286	11.48	-2.5	94.0571	3.01429	186.716	3.56571	2.82857	4.98857
54	6.87571	5.67143	13.56	0.65	94.4429	3.52	241.629	2.82571	5.55	10.0786
55	0.931429	3.90357	8.35	-7.35	88.0929	2.78429	133.997	4.71714	2.3	11.9119
56	4.90857	2.92	10.99	-4.22	95.1167	2.84571	232.443	4.07857	2.6	13.2786
57	6.70286	5.80571	12.97	1.12	93.7286	2.18	182.38	5.71857	0.333333	10.7833
58	1.33286	4.01786	9.19	-7.29	85.2271	3.66857	155.136	8.98857	0	5.23333
59	3.90571	2.61929	11.17	-5.3	89.1143	1.79429	209.457	7.83714	1.73333	4.66667
60	0.341429	2.12357	10.36	-8.19	86.8271	2.77857	153.911	7.49	1.13333	3.2
61	2.58286	1.46214	9.65	-3.06	92.0286	2.82143	191.227	6.61	2.6	5.46667
62	7.68286	5.13286	17.84	2.35	84.8857	4.21429	240.771	9.62857	3.1	8.56667
63	5.94	6.81143	13.23	1.1	89.4243	2.69429	159.016	6.76714	3.07143	9.90476
64	0.917143	3.42857	8.74	-4.63	75.2471	3.50857	78.9057	15.1829	0.15	8.92143
65	9.59429	5.25571	18.76	-4.65	68.2471	2.44286	219.616	14.3029	2.46667	8.7881
66	8.78714	9.19071	18.48	2.03	80.66	2.68571	240.271	13.84	1.275	6.9631
67	6.34571	7.56643	12.76	-0.51	78.91	2.71571	256.429	15.2371	1.4	5.29167
68	9.52143	7.93357	19.41	-1.77	61.1714	2.52	115.484	22.1971	0	5.14167
69	9.72571	9.62357	18.29	0.41	80.4643	2.65286	149.309	15.6571	2.22	4.895
70	13.3329	11.5293	22.77	5.43	79.0714	1.54857	255.143	19.6271	0.466667	4.08667
71	16.1671	14.75	27.92	7.52	65.1571	1.72143	264.4	20.54	0	2.68667
72	8.04714	12.1071	15.16	-3.33	69.3214	3.02143	133.891	19.0014	4.55	7.23667
73	8.07	8.05857	16.87	0.06	78.7543	2	220.184	19.01	1.425	6.44167
74	16.2971	12.1836	28.42	2.92	56.5729	1.95	96.08	26.5	0	5.975
75	15.9186	16.1079	27.65	7.09	66.8857	2.05714	279.829	22.9814	0.2	6.175
76	21.3214	18.62	30.91	10.98	53.7071	1.77143	218.227	25.45	0	1.625
77	13.8157	17.5686	25.96	8.29	82.1757	2.33286	241.92	15.6471	2.02	2.22
78	14.19	14.0029	24.58	2.11	68.4529	2.11571	61.4286	23.6329	1.4	3.62
79	19.3129	16.7514	32.9	3.08	55.9486	1.74714	103.93	23.85	1.33333	4.75333
80	22.18	20.7464	32.41	12.78	61.2571	1.65571	119.306	22.9729	0.8	5.55333
81	25.4514	23.8157	35.64	11.43	47.8786	1.96429	181.254	25.9957	0	3.53333
82	21.3457	23.3986	34.42	8.74	49.6857	2.13571	206.773	27.42	0	2.13333
83	21.65	21.4979	35.21	8.54	47.2971	2.48714	148.53	26.33	0	0.8
84	23.6214	22.6357	35.45	10.74	41.4686	2.32857	100.929	26.2543	0	0
85	21.3086	22.465	34.79	7.87	48.0957	2.144	78.6643	23.8786	0.1	0.1
86	21.08	21.1943	34.56	5.54	45.46	2.65857	146.646	23.2686	0	0.1
87	22.9443	22.0121	35.34	9.04	46.12	2.10714	222.257	21.3686	0	0.1
88	22.4	22.6721	34.77	8.51	46.71	2.34571	197.779	22.5957	0	0.1
89	21.27	21.835	31.85	9.65	52.0414	1.86714	199.329	18.5743	4.2	4.2
90	17.8443	19.5571	30.15	8.27	57.2357	2.09	184.4	18.78	1.2	5.4
91	18.0286	17.9364	32.6	7.68	64.39	2.34143	115.326	16.1857	6.75	12.15
92	15.6214	16.825	25.5	4.06	67.5014	1.89571	195.001	15.3529	0.6	12.75
93	14.5614	15.0914	25.15	2.78	58.1357	2.17857	222.316	15.41	2.4	10.95
94	13.8	14.1807	23.28	5.64	71.2671	2.21286	234.786	12.4329	2.4	12.15
95	9.98429	11.8921	19	1.42	81.1043	2.04286	120.471	11.5314	0.35	5.75
96	9.36857	9.67643	21.66	-2.11	65.6514	1.74286	163.184	12.9414	0	5.15
97	9.54	9.45429	22.53	-2.7	63.2843	2.49143	196.076	9.23714	3.43333	6.18333
98	9.78143	9.66071	19.74	2.54	85.3871	1.71714	216.586	9.50857	0.15	3.93333
99	7.89	8.83571	15.06	2.13	87.33	2.89714	257.014	5.71143	1.85	5.43333
100	5.72857	6.80929	10.54	-1.03	88.6571	2.50286	252.429	6.79714	1.86667	7.3
101	1.60286	3.66571	8.29	-4.9	90.0357	1.53	174.357	6.61286	0.166667	4.03333
102	0.974286	1.28857	11.79	-7.35	90.4143	1.89	225.3	5.45286	1.82	5.70333
103	8.79714	4.88571	15.76	2.82	94.6429	2.93286	167.474	4.96429	4.3	8.15333
104	1.25286	5.025	11.51	-5.93	87.3257	2.02143	114.849	7.24571	0.9	7.18667
105	2.59	1.92143	11.64	-6.68	92.2	2.42286	199.201	5.25143	5.4	12.42
Year 2011
Week	Average weekly temperature	Average temperature 2 weeks before	Average weekly maximum temperature	Average weekly minimum temperature	Average weekly relative humidity	Average weekly wind speed	Average weekly wind direction	Average weekly solar exposure (radiation)	Average weekly rainfall or precipitation	Cumulative precipitation (rainfall) 4 weeks before
	ºC	ºC	ºC	ºC	%	m/s	(360 degrees)	MJ/m^2	mm	mm
106	5.45571	4.02286	13.09	-5.73	91.6343	1.21571	196.343	4.25714	0.4	11
107	7.81571	6.63571	13.66	2.94	94.5429	2.96714	230.229	3.43286	1.85	8.55
108	4.45286	6.13429	11.32	-0.47	98.1667	1.93571	160.386	3.95714	0.55	8.2
109	2.47143	3.46214	11.8	-6.8	90.41	2.93429	115.117	6.83143	0	2.8
110	-0.344286	1.06357	6.28	-7.27	89.7571	1.82857	179.89	7.01	1.3	3.7
111	2.57	1.11286	13.32	-3.88	89.4143	1.51143	146.777	9.02	0.133333	1.98333
112	6.51429	4.54214	17.03	-0.47	78.1186	2.04714	234.4	9.65714	2	3.43333
113	4.64429	5.57929	11.45	-0.24	91.7429	3.01714	252.357	7.48	1.46	4.89333
114	7.95	6.29714	16.32	0.67	82.8657	2.42857	214.509	12.5643	0.1	3.69333
115	2.74429	5.34714	11.89	-4.69	77.3157	2.94143	77.3129	10.61	0.4	3.96
116	7.59286	5.16857	17.48	-1.38	74.5286	2.39	165.586	11.7886	0.666667	2.62667
117	7.58714	7.59	16.63	0.49	81.5414	1.78714	199.58	14.15	2.8	3.96667
118	8.30714	7.94714	16.23	-0.93	78.7086	2.96714	163.771	13.5971	2.25	6.11667
119	11.2443	9.77571	24.36	3.63	80.5343	1.98143	203.749	13.8643	0.8	6.51667
120	15.2529	13.2486	28.09	4.44	64.3214	2.30714	173.83	17.8743	0.6	6.45
121	12.3757	13.8143	24.29	0.49	64.6943	2.42	117.983	21.5814	0	3.65
122	11.9214	12.1486	22.54	5.27	80.02	2.24429	189.036	14.4386	1.38333	2.78333
123	12.1357	12.0286	20.92	4.08	77.8357	2.20571	123.376	18.0043	0.7	2.68333
124	13.5814	12.8586	22.81	5.31	69.0657	2.14714	258.729	22.4886	0.5	2.58333
125	17.0257	15.3036	28.83	1.54	59.0114	2.47429	125.491	24.0357	0	2.58333
126	16.1243	16.575	26.13	2.37	66.4657	1.91143	175.254	22.1514	1.46667	2.66667
127	18.2514	17.1879	29.28	8.99	69.1786	1.67857	170.343	20.19	1.23333	3.2
128	14.5043	16.3779	25.99	3.51	66.3071	3.09429	86.3786	24.42	0.6	3.3
129	15.1371	14.8207	28.72	7.58	69.5014	1.78429	273.971	20.3286	1.05	4.35
130	18.89	17.0136	29.84	9.1	54.6314	1.86	272.529	27.7	0	2.88333
131	22.0786	20.4843	36.16	7.14	46.8643	1	167.324	27.8214	0	1.65
132	20.3171	21.1979	32.36	6.53	53.1114	1	170.834	26.6457	0	1.05
133	19.2586	19.7879	30.88	7.5	54.2657	1	270.329	27.4371	0	0
134	19.0843	19.1714	30.99	7.04	56.2057	1	214.584	25.3329	0	0
135	17.6071	18.3457	29.12	6.61	56.12	1	172.671	27.1414	0	0
136	20.9871	19.2971	33.55	9.65	53.7257	1	87.1214	26.4114	0	0
137	21.2457	21.1164	31.35	13.01	59.05	2.38	266.314	21.51	1.9	1.9
138	21.5357	21.3907	34.51	6.23	48.4357	2.24857	174.909	22.4271	0.1	2
139	24.6529	23.0943	36.6	14.34	45.3129	3.99286	231.871	19.9629	1	3
140	18.3571	21.505	29.19	5.68	58.6814	3.44	230.669	21.5714	0.95	3.95
141	17.6086	17.9829	29.18	10.52	64.1743	3.98	246.586	16.9143	1.66667	3.71667
142	19.9886	18.7986	32.44	6.85	46.0629	3.15	257.8	20.8229	0	3.61667
143	21.0229	20.5057	32.38	8.96	51.2471	4.62714	162.713	18.9886	0	2.61667
144	17.08	19.0514	29.62	2.27	47.5686	3.66714	199.229	18.3757	0	1.66667
145	19.6329	18.3564	28.9	8.23	42.4229	4.78143	195.8	15.9343	0	0
146	15.1471	17.39	28.49	2.33	53.0786	4.20571	181.827	15.5057	0	0
147	16.48	15.8136	28.92	4.42	40.27	6.80857	190.429	14.6857	0	0
148	12.0457	14.2629	24.69	-2.13	55.0314	7.07286	207.517	10.8171	0.35	0.35
149	9.03286	10.5393	17.14	1.2	82.9757	7.37286	213.964	9.03	1.74	2.09
150	10.1129	9.57286	19.81	0.73	84.4429	3.44571	258.357	7.09	1.475	3.565
151	11.4	10.7564	20.77	4.79	80.51	3.10857	202.643	6.88857	2.43333	5.99833
152	8.37429	9.88714	14.56	0.65	86.5257	2.47429	182.8	6.02	1.65	7.29833
153	5.33429	6.85429	14.04	-2.15	94.92	1.77	130.249	5.64714	0.1	5.65833
154	4.19429	4.76429	12.26	-2.94	91.7	1.94857	209.657	6.46571	0.375	4.55833
155	5.28429	4.73929	14.4	-1.68	94.6286	1.79857	236.171	5.41857	0.35	2.475
156	5.52	5.40214	11.97	-1.56	91.0286	2.91	252.343	4.63571	1.3	2.125
157	2.59143	4.05571	13.42	-3.78	91.88	2.02571	150.72	6.22714	0.1	2.125
158	2.46714	2.52929	12.06	-4.96	86.84	1.35429	216.314	7.13286	0.1	1.85
Year 2012
Week	Average weekly temperature	Average temperature 2 weeks before	Average weekly maximum temperature	Average weekly minimum temperature	Average weekly relative humidity	Average weekly wind speed	Average weekly wind direction	Average weekly solar exposure (radiation)	Average weekly rainfall or precipitation	Cumulative precipitation (rainfall) 4 weeks before
	ºC	ºC	ºC	ºC	%	m/s	(360 degrees)	MJ/m^2	mm	mm
159	3.94857	3.20786	13.11	-2.76	93.5	2.06143	191.527	5.94571	0.375	1.875
160	-0.128571	1.91	9.1	-6.44	96.05	1.39571	131.907	4.89571	0.36	0.935
161	2.07429	0.972857	11.28	-5.02	98.25	1.46857	182.686	5.51286	0.82	1.655
162	2.40571	2.24	9.46	-3.53	95.4286	2.20857	142.367	6.81143	0.566667	2.12167
163	0.0357143	1.22071	11.55	-9.55	78.4314	2.77571	156.149	8.89571	1.1	2.84667
164	-0.634286	-0.299286	11.46	-8.35	81.14	3.26429	145.429	9.13143	0.1	2.58667
165	1.42	0.392857	11.63	-8.67	76.9014	2.28286	155.027	11.5529	0	1.76667
166	4.40857	2.91429	17.16	-7.5	47.3029	2.07286	224.594	13.7014	0	1.2
167	8.36286	6.38571	18.46	-1.95	73.0286	2.14	220.149	11.9543	1.7	1.8
168	5.30429	6.83357	16.98	-3.21	62.4471	3.67143	102.147	16.4471	0	1.7
169	9.66429	7.48429	22.45	-1.62	60.5086	2.61714	211.719	15.1543	1.05	2.75
170	6.87714	8.27071	21.2	-3.35	65.9	3.82	118.926	15.9557	0.3	3.05
171	11.6014	9.23929	21.1	0.83	43.65	4.6	194.286	18.5714	0.2	1.55
172	6.92857	9.265	18.25	0.14	88.5514	6.53571	183.66	11.2657	4.26667	5.81667
173	7.56571	7.24714	19.96	0.45	79.7471	5.73143	283.114	15.58	1.92	6.68667
174	7.88286	7.72429	16.49	-2.21	78.1686	3.28857	232.619	16.2386	0.825	7.21167
175	6.89714	7.39	14.04	1.16	86.5271	2.89286	221.737	13.4786	4.64	11.6517
176	8.89429	7.89571	16.03	1.34	80	2.72571	241.8	17.8543	1.82	9.205
177	18.9671	13.9307	29.55	4.91	62.5857	3.39143	235.986	21.2229	2.6	9.885
178	15.2571	17.1121	27.76	4.64	60.9543	3.06714	215.241	24.4386	0.6	9.66
179	15.4629	15.36	28.48	4.28	58.1786	4.22714	208.113	26.0271	0	5.02
180	19.7014	17.5821	33.02	7.42	54.6729	3.93571	258.571	24.0586	1.1	4.3
181	17.2457	18.4736	27.4	7.36	63.0186	2.88714	267.929	22.5686	0.1	1.8
182	16.7771	17.0114	28.09	4.65	59.2771	3.15286	270.371	25.9814	0	1.2
183	19.4743	18.1257	32.82	7.34	47.24	2.34	275.9	26.0143	0	1.2
184	21.4771	20.4757	36.21	5.72	47.2114	4.54571	206.837	25.2471	0	0.1
185	18.28	19.8786	30.25	6.23	54.9243	3.67143	283.229	27.2114	0	0
186	18.6814	18.4807	29.9	6.88	53.9129	3.18857	253.917	27.8457	0	0
187	21.7743	20.2279	35.14	7.67	44.23	4.01571	137.68	27.2586	0.5	0.5
188	20.8343	21.3043	33.59	9.21	61.5129	4.31429	177.526	22.1286	1.825	2.325
189	20.5914	20.7129	32.65	9.28	48.8186	2.30429	277.329	25.3957	0	2.325
190	23.2729	21.9321	38.62	9.27	42.2657	1.62143	260.214	23.9786	0	2.325
191	21.7657	22.5193	34.81	9.57	52.0214	1.88429	240.271	22.7114	3.4	5.225
192	22.1086	21.9371	34.41	6.39	49.9057	1.79	266.114	22.7829	0	3.4
193	17.17	19.6393	29.72	4.22	53.4786	2.06429	146.401	20.89	0	3.4
194	18.0486	17.6093	31.66	6.47	60.5857	1.52429	143.111	19.2371	0.15	3.55
195	18.4486	18.2486	31.64	3.25	53.11	1.47	214.171	18.7786	0	0.15
196	19.2943	18.8714	28.89	7.76	59.5686	2.09143	180.689	14.7514	0.3	0.45
197	11.7771	15.5357	19.32	3.02	82.5957	2.30429	169.27	10.33	2.95	3.4
198	15.6043	13.6907	27.99	3.75	63.6414	1.44286	232.571	15.5343	0	3.25
199	15.3043	15.4543	27.44	4.24	73.4429	1.65143	261.357	11.4786	0.4	3.65
200	9.30714	12.3057	19.09	1.01	81.6671	1.61286	258.357	9.44429	11.6333	14.9833
201	10.8786	10.0929	21.89	-2.29	86.7143	1.4	212.657	8.19714	1.88	13.9133
202	8.06143	9.47	16.91	-2.64	89.7471	1.90429	221.627	6.20429	3.48	17.3933
203	6.97714	7.51929	12.78	-1.02	90.2714	1.94143	205.193	6.27143	0.26	17.2533
204	8.10857	7.54286	17.28	-2.25	88.6857	1.62	101.62	7.04	2.73333	8.35333
205	7.39571	7.75214	14.44	-2.44	88.4429	1.48	229.1	6.28857	0.9	7.37333
206	1.94143	4.66857	10.66	-4.69	90.2857	1.67714	245.211	6.10857	1.66667	5.56
207	3.55429	2.74786	10.25	-4.87	90.5857	2.00286	212.843	6.35143	0.266667	5.56667
208	4.50429	4.02929	12.07	-4.85	93.2	3.68571	198.671	3.64286	0.48	3.31333
209	8.36714	6.43571	14.78	2.43	92.6571	2.28429	232.571	5.02571	0.5	2.91333
Year 2013
Week	Average weekly temperature	Average temperature 2 weeks before	Average weekly maximum temperature	Average weekly minimum temperature	Average weekly relative humidity	Average weekly wind speed	Average weekly wind direction	Average weekly solar exposure (radiation)	Average weekly rainfall or precipitation	Cumulative precipitation (rainfall) 4 weeks before
	ºC	ºC	ºC	ºC	%	m/s	(360 degrees)	MJ/m^2	mm	mm
210	4.93429	6.65071	15.2	-0.99	89.53	2.04143	226.914	4.73429	0.56	1.80667
211	3.68429	4.30929	11.56	-2.46	91.3143	2.31714	194.514	6.85143	0.491667	2.03167
212	4.99857	4.34143	12.97	-1.34	93.1714	2.50286	244.686	5.66429	0.652857	2.20452
213	5.00857	5.00357	11.38	-1.87	94.3143	3.80571	257.786	4.06571	2.97143	4.67595
214	4.36714	4.68786	12.42	-1.77	91.3571	2.83571	257.943	6.12143	1.34667	5.46262
215	5.71714	5.04214	15.55	-2.36	85.29	2.63429	260.014	9.85143	0.342857	5.31381
216	3.75143	4.73429	14.23	-2.46	78.13	3.24857	275.071	9.94571	0.78	5.44095
217	4.96571	4.35857	14.89	-1.79	84.4571	3.54857	243.371	10.6829	0.8825	3.35202
218	5.04	5.00286	13.02	-2.21	88.1014	5.36857	207.26	7.91857	1.945	3.95036
219	2.34286	3.69143	13.22	-4.79	81.2129	4.8	155.381	11.3929	0.585	4.1925
220	7.84429	5.09357	15.38	3.41	87.58	4.09286	215.714	8.11	5.68	9.0925
221	4.21429	6.02929	10.84	-3.43	80.6	8.39857	267.943	12.4529	3.92	12.13
222	6.04143	5.12786	15.37	-0.12	83.6514	6.10857	240.114	12.9243	1.98	12.165
223	9.21	7.62571	15.46	4.3	90.9714	4.9	250.771	10.3129	8.06667	19.6467
224	5.64	7.425	12.7	-1.81	83.6971	3.11571	228.771	13.9714	3.94	17.9067
225	10.1557	7.89786	22.47	3.33	78.6543	3.74571	242.729	16.0514	2.65	16.6367
226	12.3957	11.2757	25.67	-2.8	64.6329	3.61857	169.5	23.2971	0	14.6567
227	9.72	11.0579	21.74	-1.95	67.1829	6.61857	90.8086	20.5814	6.7	13.29
228	8.46857	9.09429	21.77	0.57	74.8014	8.04	82.5871	18.7557	4.2	13.55
229	13.5286	10.9986	21.81	2.94	71.0086	6.37143	204.491	18.46	0.95	11.85
230	9.22429	11.3764	23.99	3.12	73.7071	5.33571	203.227	19.6514	5.7	17.55
231	11.1757	10.2	21.49	2.84	65.9114	7.93286	120.801	24.6843	0	10.85
232	11.0057	11.0907	19.48	1.99	66.0043	5.09429	154.441	24.7043	1.5	8.15
233	14.2971	12.6514	27.05	3.86	65.0686	4.03714	193.974	22.4671	0.866667	8.06667
234	19.5571	16.9271	30.6	9.79	56.77	2.93	272.043	26.1629	0	2.36667
235	15.2486	17.4029	28.56	7.95	69.7114	2.87286	223.391	22.1843	6.35	8.71667
