# Supplementary material
Source: MDPI journal article supplement (https://www.mdpi.com/1999-4907/14/8/1662)
Supplement: s1 [file s1 › Table S2.xlsx]

## Sheet: Hoja2
abbreviated scientific name	Current scientific name	Fungi herbarium number
Abo.bie	Abortiporus biennis (Bull.) Singer	AFR001
Aga.arv	Agaricus arvensis Schaeff.	AFR002
Aga.cam	Agaricus campestris L.	AFR003
Aga.lan	Agaricus langei (F.H. Møller) F.H. Møller	AFR004
Aga.syl	Agaricus sylvicola (Vittad.) Peck	AFR005
Aga.uri	Agaricus urinascens (Jul. Schäff. & F.H. Møller) Singer	AFR006
Agr.ped	Agrocybe pediades (Fr.) Fayod	AFR007
Agr.pra	Agrocybe praecox (Pers.) Fayod	AFR008
Ale.aur	Aleuria aurantia (Pers.) Fuckel	AFR009
Ama.ast	Amanita asteropus Sabo ex Romagn.	AFR010
Ama.bou	Amanita boudieri Barla	AFR011
Ama.cit.1	Amanita citrina var. citrina Pers.	AFR012
Ama.cit.2	Amanita citrina var. alba (Pers.) Quél. & Bataille	AFR013
Ama.cur	Amanita curtipes E.-J. Gilbert	AFR014
Ama.fra	Amanita franchetii (Boud.) Fayod	AFR015
Ama.mus	Amanita muscaria (L.) Lam.	AFR016
Ama.pha	Amanita phalloides (Vaill. ex Fr.) Link	AFR017
Ama.pro	Amanita proxima Dumée	AFR018
Ama.rub	Amanita rubescens Pers.	AFR019
Arm.mel	Armillaria mellea (Vahl) P. Kumm.	AFR020
Ast.hyg	Astraeus hygrometricus (Pers.) Morgan	AFR021
Bol.aer	Boletus aereus Bull.	AFR022
Bol.imp	Hemileccinum impolitum (Fr.) Šutara	AFR023
Bol.quel	Suillellus queletii (Schulzer) Vizzini, Simonini & Gelardi	AFR024
Bol.rad	Caloboletus radicans (Pers.) Vizzini	AFR025
Bol.rho	Imperator rhodopurpureus (Smotl.) Assyov, Bellanger, Bertéa, Courtec., Koller, Loizides, G. Marques, J.A. Muñoz, Oppicelli, D. Puddu, F. Rich. & P.-A. Moreau	AFR026
Bov.plu	Bovista plumbea Pers.	AFR027
Cal.cya	Calvatia cyathiformis (Bosc) Morgan	AFR028
Cha.pip	Chalciporus piperatus (Bull.) Bataille	AFR029
Cla.rug	Clavulina rugosa (Bull.) J. Schröt.	AFR030
Cli.can	Leucocybe candicans (Pers.) Vizzini, P. Alvarado, G. Moreno & Consiglio	AFR031
Cli.gib	Clitocybe mediterranea (Vizzini, Contu & Musumeci) E. Ludw.	AFR032
Cli.met	Clitocybe metachroa (Fr.) P. Kumm.	AFR033
Cli.odo	Clitocybe odora (Bull.) P. Kumm.	AFR034
Cli.riv	Clitocybe rivulosa (Pers.) P. Kumm.	AFR035
Cli.squ	Infundibulicybe squamulosa (Pers.) Harmaja	AFR036
Con.sp	Conocybe anthracophila Maire & Kühner ex Kühner & Watling	AFR037
Cop.dom	Coprinellus domesticus (Bolton) Vilgalys, Hopple & Jacq. Johnson	AFR038
Cor.dec	Cortinarius decipiens (Pers.) Zawadzki	AFR039
Cor.hel	Cortinarius scobinaceus Malençon & Bertault	AFR040
Cor.sp	Cortinarius purpurascens Fr.	AFR041
Cor.tri	Cortinarius trivialis J.E. Lange	AFR042
Cre.var	Crepidotus variabilis (Pers.) P. Kumm.	AFR043
Cru.lae	Crucibulum laeve (Huds.) Kambly	AFR044
Cys.gra	Cystodermella granulosa (Batsch) Harmaja	AFR045
Der.cun	Dermoloma cuneifolium (Fr.) Singer ex Bon	AFR046
Ent.cly	Entoloma clypeatum (L.) P. Kumm.	AFR047
Ent.jun	Entoloma juncinum (Kühner & Romagn.) Noordel.	AFR048
Ent.liv	Entoloma lividoalbum (Kühner & Romagn.) Kubicka	AFR049
Ent.rho	Entoloma rhodopolium (Fr.) P. Kumm.	AFR050
Ent.sin	Entoloma sinuatum (Bull.) P. Kumm.	AFR051
Gal.sp	Galerina vittiformis (Fr.) Singer	AFR052
Gym.dry	Gymnopus dryophilus (Bull.) Murrill	AFR053
Gym.que	Collybiopsis quercophila (Pouzar) R.H. Petersen	AFR054
Gym.spc	Gymnopilus junonius (Fr.) P.D. Orton	AFR055
Gyr.cast	Gyroporus castaneus (Bull.) Quél.	AFR056
Heb.sp	Hebeloma crustuliniforme (Bull.) Quél.	AFR057
Hel.ace	Helvella acetabulum (L.) Quél.	AFR058
Hel.hel	Helvella helvellula (Durieu & Mont.) Dissing	AFR059
Hel.lac	Helvella lacunosa Afzel.	AFR060
Hi.seric	Entoloma sericeum Quél.	AFR061
Hyg.cos	Hygrophorus cossus (Sowerby) Fr.	AFR062
Hyg.pen	Hygrophorus penarius Fr.	AFR063
Hyg.per	Hygrophorus persoonii Arnolds	AFR064
Hyp.fas	Hypholoma fasciculare (Huds.) P. Kumm.	AFR065
Ino.flo	Inocybe flocculosa Sacc.	AFR066
Ino.fra	Inocybe fraudans (Britzelm.) Sacc.	AFR067
Ino.lan	Inocybe langei R. Heim	AFR068
Lac.atl	Lactarius atlanticus Bon	AFR069
Lac.chr	Lactarius chrysorrheus Fr.	AFR070
Lac.ful	Lactarius fulvissimus Romagn.	AFR071
Lac.lac	Laccaria laccata (Scop.) Cooke	AFR072
Lec.lep	Leccinellum lepidum (H. Bouchet ex Essette) Bresinsky & Manfr. Binder	AFR073
Lep.cly	Lepiota clypeolaria (Bull.) P. Kumm.	AFR074
Lep.nud	Lepista nuda (Bull.) Cooke	AFR075
Lep.ore	Lepiota oreadiformis Velen.	AFR076
Lep.pan	Lepista panaeolus (Fr.) P. Karst.	AFR077
Lep.per	Lepista personata (Fr.) Cooke	AFR078
Lep.sp	Lepiota castanea Quél.	AFR079
Lim.ill	Zhuliangomyces illinitus (Fr.) Redhead	AFR080
Lyc.exc	Lycoperdon excipuliforme (Scop.) Pers.	AFR081
Lyc.mol	Lycoperdon molle Pers.	AFR082
Lyc.nig	Lycoperdon nigrescens Pers.	AFR083
Lyc.per	Lycoperdon perlatum Pers.	AFR084
Lyc.pyr	Apioperdon pyriforme (Schaeff.) Vizzin	AFR085
Lyo.rho	Lyophyllum rhopalopodium Clémençon	AFR086
Lyo.sem	Lyophyllum semitale (Fr.) Kühner	AFR087
Mac.jun	Typhula juncea (Alb. & Schwein.) P. Karst.	AFR088
Mac.pha	Macrolepiota phaeodisca Bellù	AFR089
Mac.pro	Macrolepiota procera (Scop.) Singer	AFR090
Mar.lep	Crinipellis scabella (Alb. & Schwein.) Murrill	AFR091
Mel.amb	Melanogaster ambiguus (Vittad.) Tul. & C. Tul.	AFR092
Myc.aci	Mycena acicula (Schaeff.) P. Kumm.	AFR093
Myc.aur	Mycena aurantiomarginata (Fr.) Quél.	AFR094
Myc.cit	Mycena citrinomarginata Gillet	AFR095
Myc.gri	Mycena vitilis (Fr.) Quél.	AFR096
Myc.lep	Atheniella leptophylla (Peck) Gminder & Böhning	AFR097
Myc.mel	Mycena meliigena (Berk. & Cooke) Sacc.	AFR098
Myc.pur	Mycena pura (Pers.) P. Kumm.	AFR099
Myc.ros	Mycena rosea Gramberg	AFR100
Omp.obs	Arrhenia obscurata (D.A. Reid) Redhead, Lutzoni, Moncalvo & Vilgalys	AFR101
Oti.alu	Otidea alutacea (Pers.) Massee	AFR102
Par.aur	Parasola auricoma (Pat.) Redhead, Vilgalys & Hopple	AFR103
Par.hem	Parasola hemerobia (Fr.) Redhead, Vilgalys & Hopple	AFR104
Par.lei	Parasola leiocephala (P.D. Orton) Redhead, Vilgalys & Hopple	AFR105
Pen.que	Peniophora quercina (Pers.) Cooke	AFR106
Pez.arv	Peziza arvernensis Roze & Boud.	AFR107
Pez.bad	Legaliana badia (Pers.) Van Vooren	AFR108
Pez.phy	Phylloscypha phyllogena (Cooke) Van Vooren	AFR109
Pha.eri	Phaeomarasmius erinaceus (Fr.) Scherff. ex Romagn.	AFR110
Pho.car	Pholiota carbonaria (Fr.) Singer	AFR111
Pho.gum	Pholiota gummosa (Lasch) Singer	AFR112
Pis.ari	Pisolithus arizhus (Scop.) Rauschert	AFR113
Ple.ery	Pleurotus eryngii (DC.) Quél.	AFR114
Plu.eph	Pluteus ephebeus (Fr.) Gillet	AFR115
Pol.arc	Lentinus arcularius (Batsch) Zmitr.	AFR116
Psa.pil	Psathyrella piluliformis (Bull.) P.D. Orton	AFR117
Psa.spa	Psathyrella spadiceogrisea (Schaeff.) Maire	AFR118
Psi.sub	Psilocybe subviscida (Peck) Kauffman	AFR119
Rho.but	Rhodocollybia butyracea (Bull.) Lennox	AFR120
Rus.atr	Russula fragilis Fr.	AFR121
Rus.chl	Russula chloroides (Krombh.) Bres.	AFR122
Rus.del	Russula delica Fr.	AFR123
Rus.gra	Russula graveolens Romell	AFR124
Rus.het	Russula heterophylla (Fr.) Fr.	AFR125
Rus.mac	Russula maculata Quél.	AFR126
Rus.nig	Russula nigricans Fr.	AFR127
Rus.pec	Russula pectinatoides Peck	AFR128
Rus.pse	Russula pseudoaffinis Migl. & Nicolaj	AFR129
Rus.pso	Russula pseudo-olivascens Kärcher	AFR130
Rus.sor	Russula sororia (Fr.) Romell	AFR131
Rus.sp	Russula rubroalba (Singer) Romagn	AFR132
Rus.ves	Russula vesca Fr.	AFR133
Sar.coc	Sarcoscypha coccinea (Jacq.) Lambotte	AFR134
Scl.cit	Scleroderma citrinum Pers.	AFR135
Scl.ver	Scleroderma verrucosum (Bull.) Pers.	AFR136
Ste.hir	Stereum hirsutum (Willd.) Pers.	AFR137
Str.cor	Stropharia coronilla (Bull.) W. Saunders & W.G. Sm.	AFR138
Tar.gai	Tarzetta gaillardiana (Boud.) Korf & J.K. Rogers	AFR139
The.ter	Thelephora terrestris Ehrh.	AFR140
Tre.mes	Tremella mesenterica (Schaeff.) Pers.	AFR141
Tri.ace	Tricholoma acerbum (Bull. ex Pers.) Quél.	AFR142
Tri.imb	Tricholoma imbricatum (Fr.) P. Kumm.	AFR143
Tri.ori	Tricholoma orirubens Quél.	AFR144
Tri.sap	Tricholoma saponaceum (Fr.) P. Kumm.	AFR145
Tri.sca	Tricholoma scalpturatum (Fr.) Quél.	AFR146
Tri.sul	Tricholoma sulphureum (Bull.) P. Kumm.	AFR147
Tub.fur	Tubaria furfuracea (Pers.) Gillet	AFR148
Xer.chr	Xerocomellus chrysenteron (Bull.) Šutara	AFR149
Xer.por	Xerocomellus porosporus (Imler ex Watling) Šutara	AFR150
in red, species not shown in Figure 8
